# Supplementary material
Source: PubMed Central journal article supplement (PMC1783419)

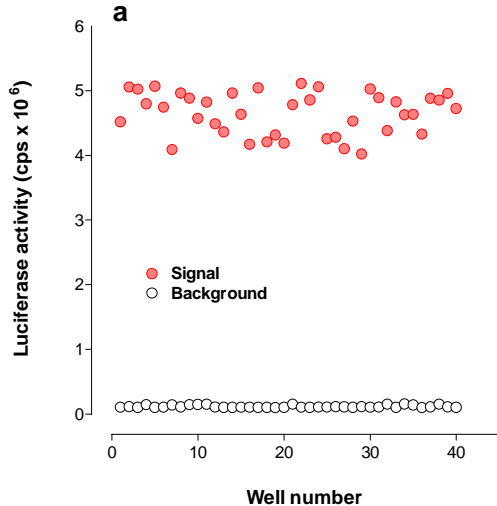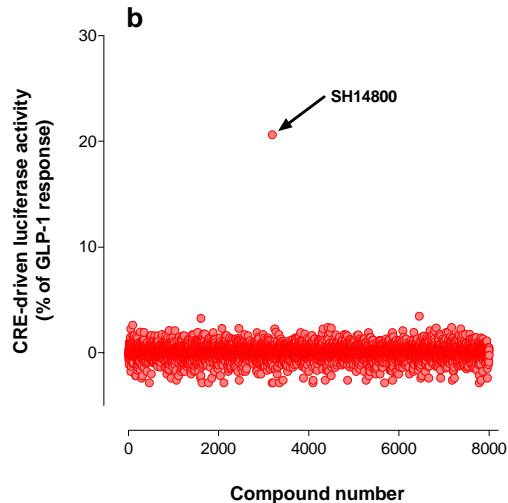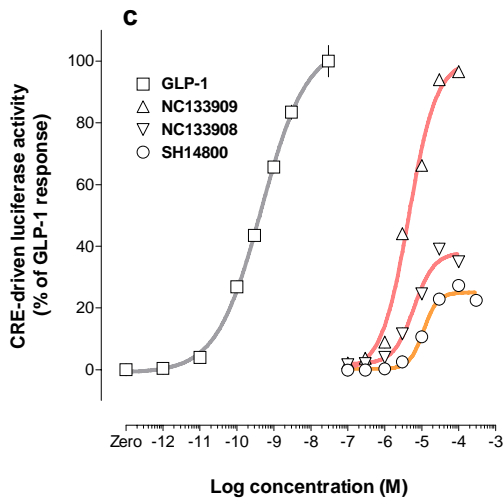

Supplement: pnas_0610173104_1.pdf [file pnas_0610173104_1.pdf]

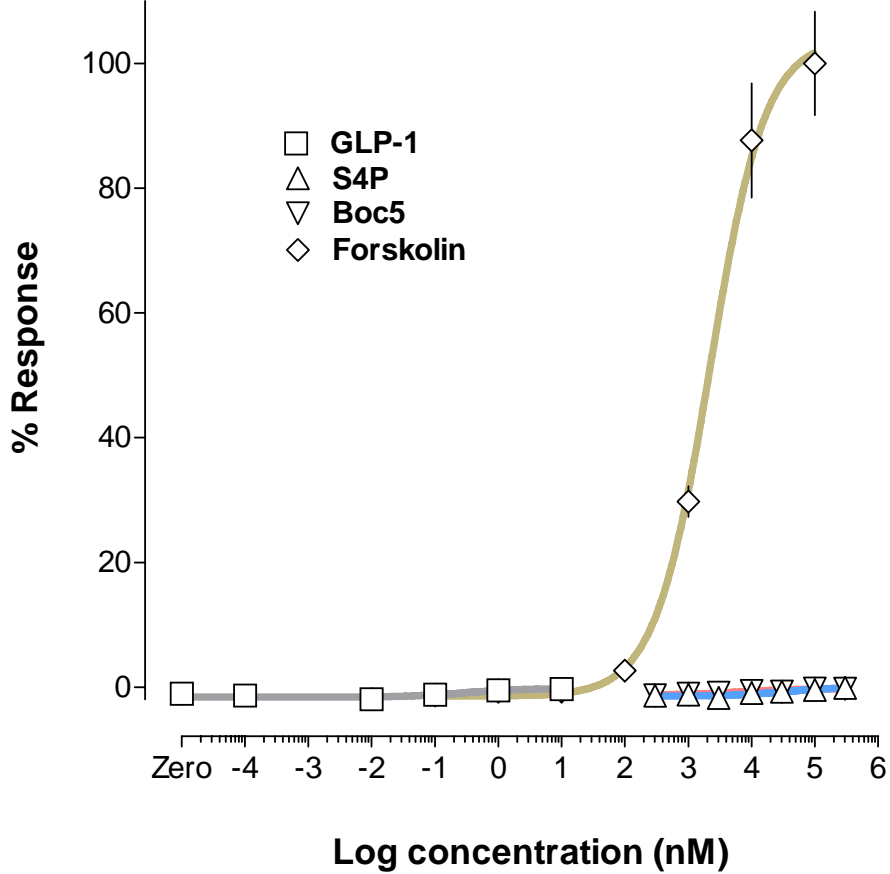

Supplement: pnas_0610173104_2.pdf [file pnas_0610173104_2.pdf]

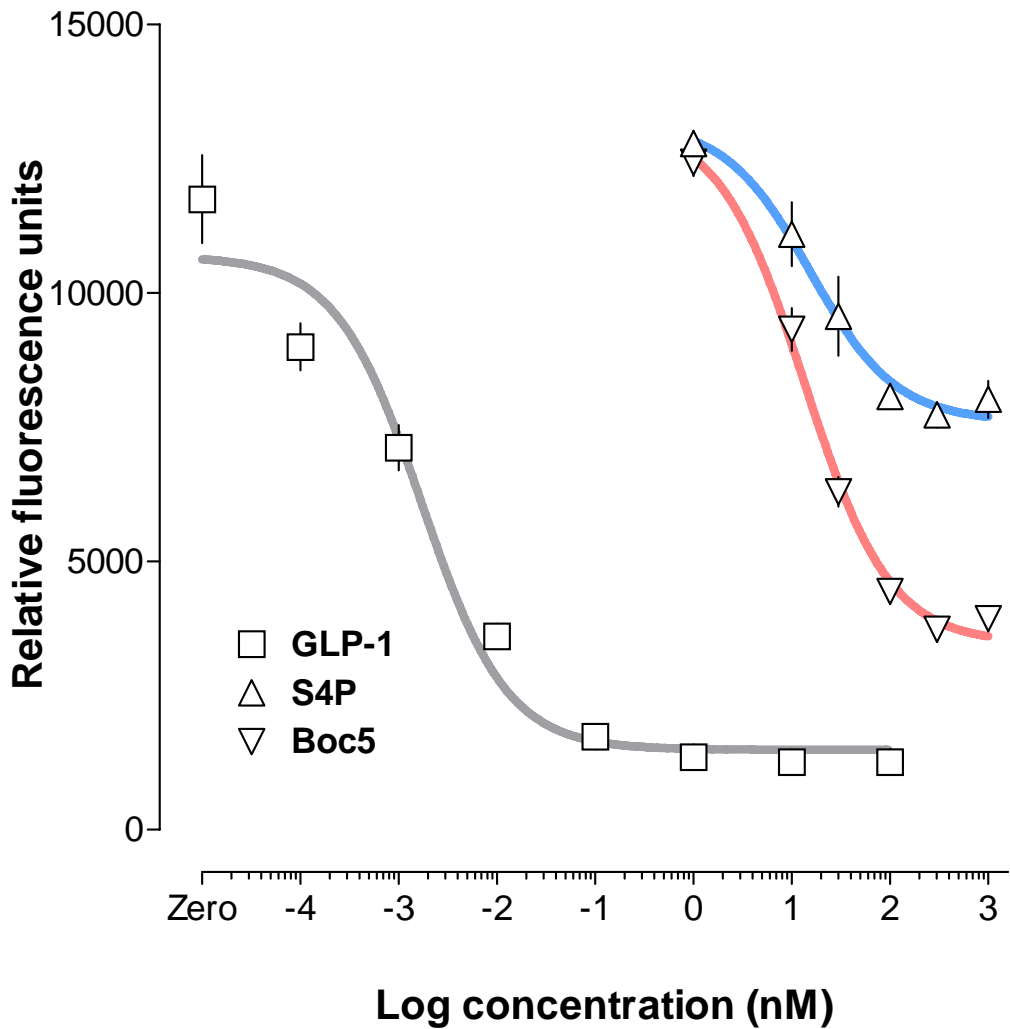

Supplement: pnas_0610173104_3.pdf [file pnas_0610173104_3.pdf]

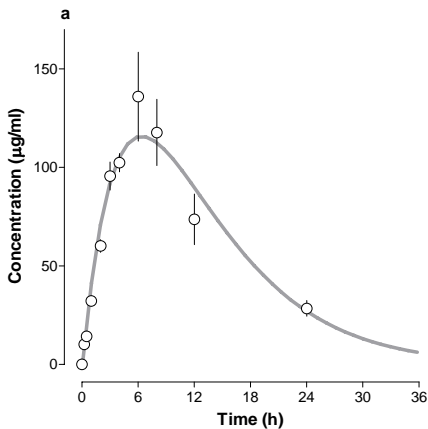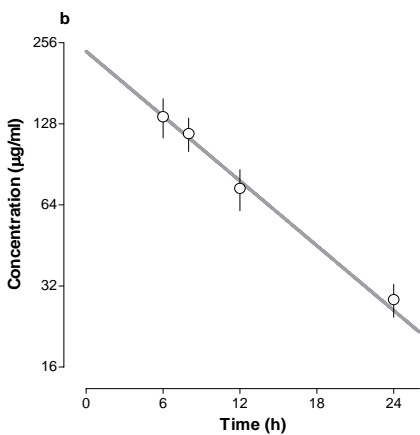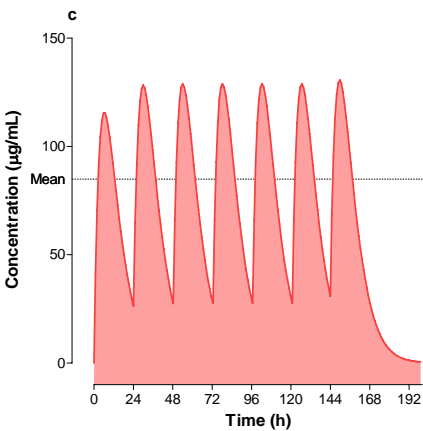

Supplement: pnas_0610173104_4.pdf [file pnas_0610173104_4.pdf]

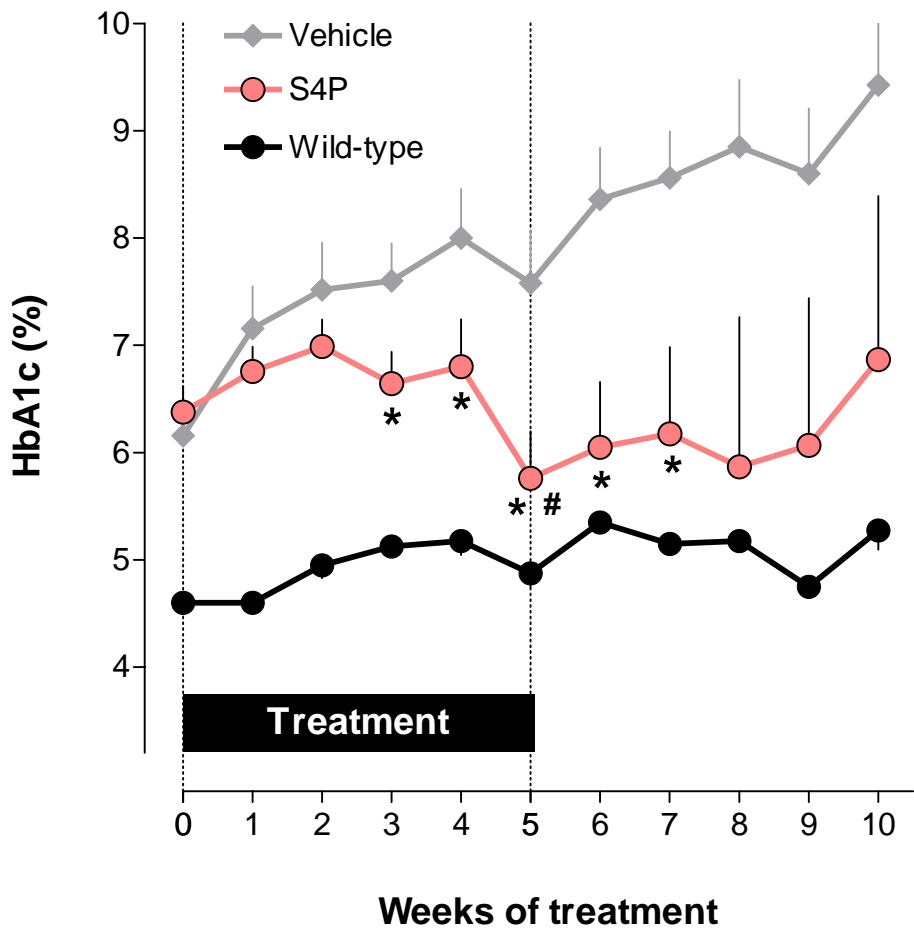

Supplement: pnas_0610173104_5.pdf [file pnas_0610173104_5.pdf]

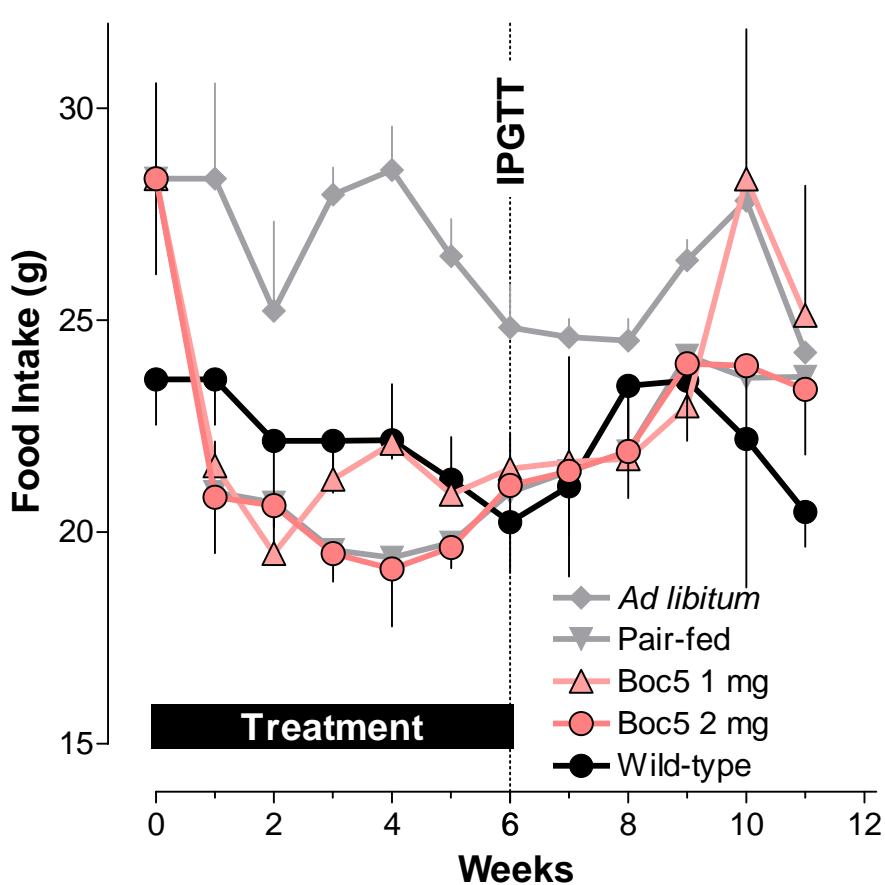

Supplement: pnas_0610173104_6.pdf [file pnas_0610173104_6.pdf]

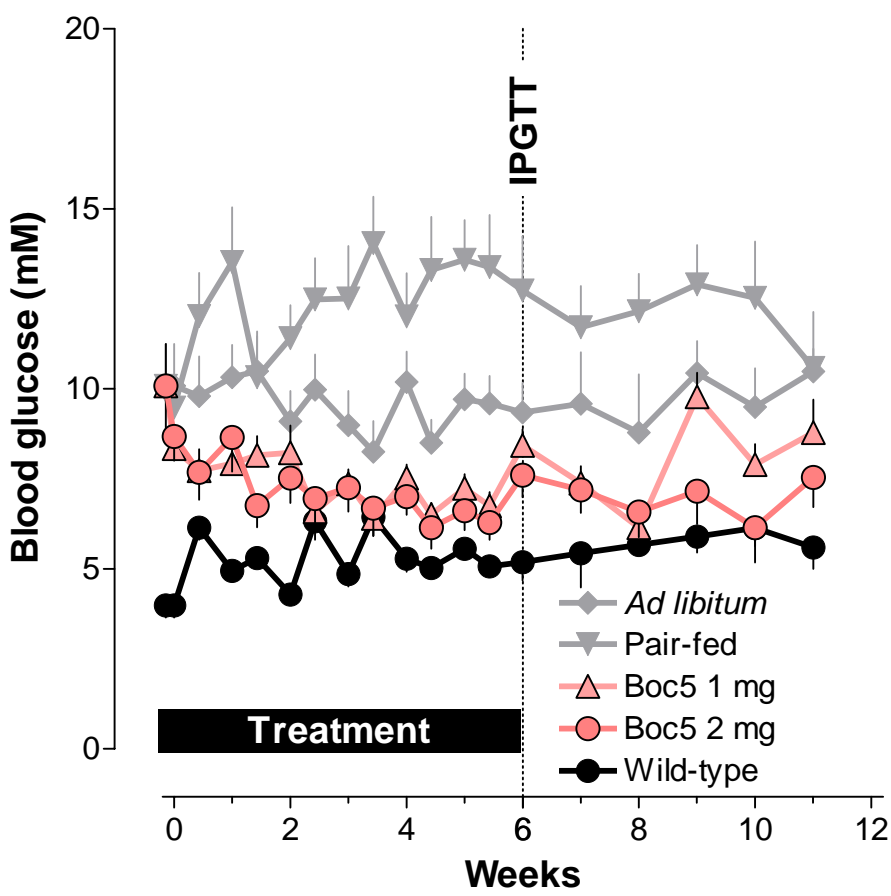

Supplement: pnas_0610173104_7.pdf [file pnas_0610173104_7.pdf]
